# Supplementary material for: Nomogram for predicting overall survival in patients with large (>5 cm) hepatocellular carcinoma based on real-world practice
Source: PubMed Central journal article supplement — J Liver Cancer. 2023 Sep 6;23(2):350–61. doi: 10.17998/jlc.2023.08.10 (PMC10565549; doi:10.17998/jlc.2023.08.10), 2023-09-06
Supplement: jlc-2023-08-10-Supplementary-Fig-2.pdf [file jlc-2023-08-10-Supplementary-Fig-2.pdf]

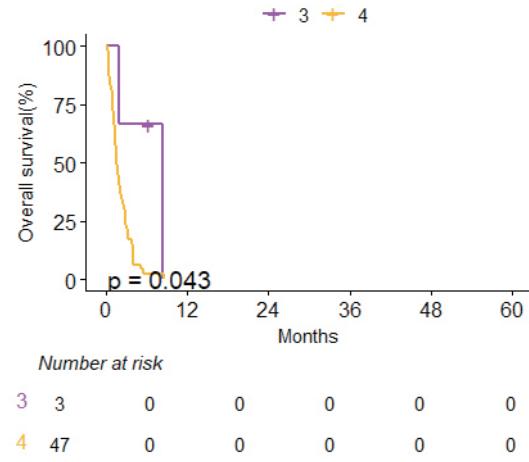

(A)

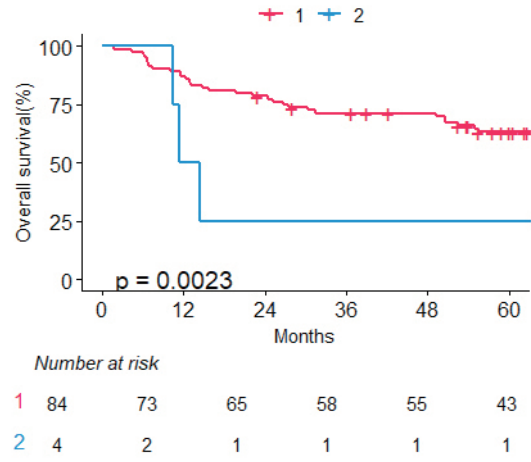

(B)

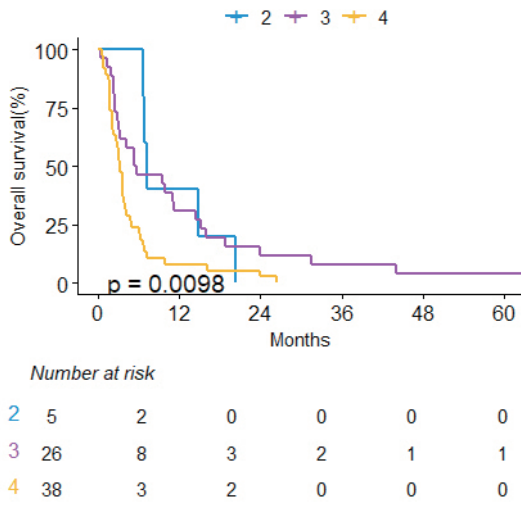

(C)

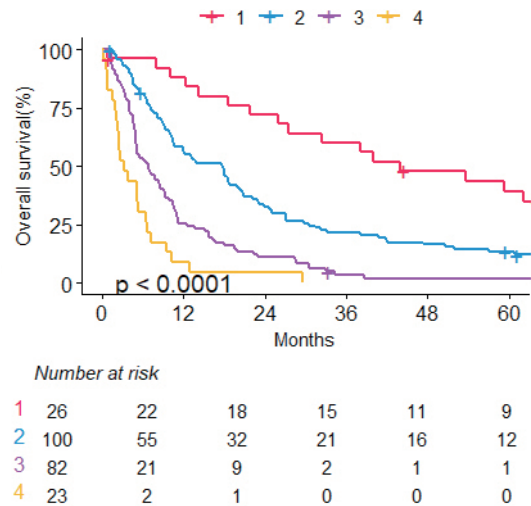

(D)

**Supplementary Figure 2.** Kaplan-Meier survival curves stratified according to the new nomogram for (A) best supportive care group, (B) surgery group, (C) sorafenib alone group, and (D) other local treatment group.
