# Supplementary material for: Nomogram for predicting overall survival in patients with large (>5 cm) hepatocellular carcinoma based on real-world practice
Source: PubMed Central journal article supplement — J Liver Cancer. 2023 Sep 6;23(2):350–61. doi: 10.17998/jlc.2023.08.10 (PMC10565549; doi:10.17998/jlc.2023.08.10), 2023-09-06
Supplement: jlc-2023-08-10-Supplementary-Table-1.pdf [file jlc-2023-08-10-Supplementary-Table-1.pdf]

**Supplementary Table 1.** STROBE statement: checklist of items that should be included in reports of observational studies

|                           | Item No | Recommendation                                                                                                                                                                                    | Section                                               |
|---------------------------|---------|---------------------------------------------------------------------------------------------------------------------------------------------------------------------------------------------------|-------------------------------------------------------|
| Title and abstract        | 1       | (a) Indicate the study's design with a commonly used term in the title or the abstract                                                                                                            | Abstract                                              |
|                           |         | (b) Provide in the abstract an informative and balanced summary of what was done and what was found                                                                                               | Abstract                                              |
| <b>Introduction</b>       |         |                                                                                                                                                                                                   |                                                       |
| Background/rationale      | 2       | Explain the scientific background and rationale for the investigation being reported                                                                                                              | 2nd paragraph                                         |
| Objectives                | 3       | State specific objectives, including any prespecified hypotheses                                                                                                                                  | 3rd paragraph                                         |
| <b>Methods</b>            |         |                                                                                                                                                                                                   |                                                       |
| Study design              | 4       | Present key elements of study design early in the paper                                                                                                                                           | Patient population section                            |
| Setting                   | 5       | Describe the setting, locations, and relevant dates, including periods of recruitment, exposure, follow-up, and data collection                                                                   | Patient population section<br>Data collection section |
| Participants              | 6       | (a) Give the eligibility criteria, and the sources and methods of selection of participants. Describe methods of follow-up                                                                        | Patient population section                            |
|                           |         | (b) For matched studies, give matching criteria and number of exposed and unexposed                                                                                                               | NA                                                    |
| Variables                 | 7       | Clearly define all outcomes, exposures, predictors, potential confounders, and effect modifiers. Give diagnostic criteria, if applicable                                                          | Data collection                                       |
| Data sources/ measurement | 8*      | For each variable of interest, give sources of data and details of methods of assessment (measurement). Describe comparability of assessment methods if there is more than one group              | Data collection section                               |
| Bias                      | 9       | Describe any efforts to address potential sources of bias                                                                                                                                         | Discussion section                                    |
| Study size                | 10      | Explain how the study size was arrived at                                                                                                                                                         | Patient population                                    |
| Quantitative variables    | 11      | Explain how quantitative variables were handled in the analyses. If applicable, describe which groupings were chosen and why                                                                      | Data collection section                               |
| Statistical methods       | 12      | (a) Describe all statistical methods, including those used to control for confounding                                                                                                             | Statistical analysis section                          |
|                           |         | (b) Describe any methods used to examine subgroups and interactions                                                                                                                               | Statistical analysis section                          |
|                           |         | (c) Explain how missing data were addressed                                                                                                                                                       | NA                                                    |
|                           |         | (d) If applicable, explain how loss to follow-up was addressed                                                                                                                                    | NA                                                    |
|                           |         | (e) Describe any sensitivity analyses                                                                                                                                                             | NA                                                    |
| <b>Results</b>            |         |                                                                                                                                                                                                   |                                                       |
| Participants              | 13*     | (a) Report numbers of individuals at each stage of study—eg numbers potentially eligible, examined for eligibility, confirmed eligible, included in the study, completing follow-up, and analysed | Methods section                                       |
|                           |         | (b) Give reasons for non-participation at each stage                                                                                                                                              |                                                       |
|                           |         | (c) Consider use of a flow diagram                                                                                                                                                                |                                                       |
| Descriptive data          | 14*     | (a) Give characteristics of study participants (eg demographic, clinical, social) and information on exposures and potential confounders                                                          | Patients and tumor characteristics section            |
|                           |         | (b) Indicate number of participants with missing data for each variable of interest                                                                                                               | NA                                                    |

**Supplementary Table 1.** Continued

|                   | Item No | Recommendation                                                                                                                                                                                                 | Section                                          |
|-------------------|---------|----------------------------------------------------------------------------------------------------------------------------------------------------------------------------------------------------------------|--------------------------------------------------|
|                   |         | (c) Summarise follow-up time (eg, average and total amount)                                                                                                                                                    | Survival outcomes and prognostic factors section |
| Outcome data      | 15*     | Report numbers of outcome events or summary measures over time                                                                                                                                                 | Survival outcomes and prognostic factors section |
| Main results      | 16      | (a) Give unadjusted estimates and, if applicable, confounder-adjusted estimates and their precision (e.g., 95% confidence interval). Make clear which confounders were adjusted for and why they were included | Survival outcomes and prognostic factors section |
|                   |         | (b) Report category boundaries when continuous variables were categorized                                                                                                                                      | Survival outcomes and prognostic factors section |
|                   |         | (c) If relevant, consider translating estimates of relative risk into absolute risk for a meaningful time period                                                                                               | NA                                               |
| Other analyses    | 17      | Report other analyses done—eg analyses of subgroups and interactions, and sensitivity analyses                                                                                                                 | Nomogram section                                 |
| Discussion        |         |                                                                                                                                                                                                                |                                                  |
| Key results       | 18      | Summarise key results with reference to study objectives                                                                                                                                                       | 1st paragraph                                    |
| Limitations       | 19      | Discuss limitations of the study, taking into account sources of potential bias or imprecision. Discuss both direction and magnitude of any potential bias                                                     | 7th paragraph                                    |
| Interpretation    | 20      | Give a cautious overall interpretation of results considering objectives, limitations, multiplicity of analyses, results from similar studies, and other relevant evidence                                     | 2nd-6th paragraph                                |
| Generalisability  | 21      | Discuss the generalisability (external validity) of the study results                                                                                                                                          | Last paragraph                                   |
| Other information |         |                                                                                                                                                                                                                |                                                  |
| Funding           | 22      | Give the source of funding and the role of the funders for the present study and, if applicable, for the original study on which the present article is based                                                  | NA                                               |

Note: An explanation and elaboration article discusses each checklist item and gives methodological background and published examples of transparent reporting. The STROBE checklist is best used in conjunction with this article (freely available on the web sites of PLoS Medicine at <http://www.plosmedicine.org/>, Annals of Internal Medicine at <http://www.annals.org/>, and Epidemiology at <http://www.epidem.com/>). Information on the STROBE Initiative is available at <http://www.strobe-statement.org>.

STROBE, strengthening the reporting of observational studies in epidemiology; NA, not applicable.

\*Give information separately for exposed and unexposed groups.
