# Supplementary material for: Nomogram for predicting overall survival in patients with large (>5 cm) hepatocellular carcinoma based on real-world practice
Source: PubMed Central journal article supplement — J Liver Cancer. 2023 Sep 6;23(2):350–61. doi: 10.17998/jlc.2023.08.10 (PMC10565549; doi:10.17998/jlc.2023.08.10), 2023-09-06
Supplement: jlc-2023-08-10-Supplementary-Table-2.pdf [file jlc-2023-08-10-Supplementary-Table-2.pdf]

**Supplementary Table 2.** Detailed information on initial treatment

| <b>Initial treatment</b>      | <b>Total (n=438)</b> |
|-------------------------------|----------------------|
| Best supportive care          | 50 (11.4)            |
| Sorafenib alone               | 69 (15.8)            |
| Surgery                       | 88 (20.1)            |
| Non-surgical local treatments | 231 (52.7)           |
| RT alone                      | 20 (4.6)             |
| TACE                          | 104 (23.7)           |
| TACE+RT                       | 78 (17.8)            |
| Sorafenib+RT                  | 29 (6.6)             |

The values are presented as number (%).

RT, radiotherapy; TACE, trans-arterial chemoembolization.
