# Supplementary material for: Nomogram for predicting overall survival in patients with large (>5 cm) hepatocellular carcinoma based on real-world practice
Source: PubMed Central journal article supplement — J Liver Cancer. 2023 Sep 6;23(2):350–61. doi: 10.17998/jlc.2023.08.10 (PMC10565549; doi:10.17998/jlc.2023.08.10), 2023-09-06
Supplement: jlc-2023-08-10-Supplementary-Table-3.pdf [file jlc-2023-08-10-Supplementary-Table-3.pdf]

**Supplementary Table 3.** Prognostic factors for progression-free survival

| Progression-free survival                       | Univariable analysis |            |         | Multivariable analysis |            |         |
|-------------------------------------------------|----------------------|------------|---------|------------------------|------------|---------|
|                                                 | HR                   | 95% CI     | P-value | HR                     | 95% CI     | P-value |
| Age, continuous (year)                          | 0.99                 | 0.98-1.00  | 0.027   | 1.00                   | 0.99-1.01  | 0.616   |
| ECOG PS, 0-1 vs. 2-4                            | 4.77                 | 2.87-7.95  | <0.001  | 3.70                   | 1.99-6.84  | 0.003   |
| Gender, female vs. male                         | 1.17                 | 0.86-1.59  | 0.319   |                        |            |         |
| Etiology, viral vs. non-viral                   | 0.64                 | 0.52-0.80  | <0.001  | 0.84                   | 0.64-1.09  | 0.180   |
| mALBI, grade 1 vs. grade 2a                     | 1.50                 | 1.17-1.93  | 0.001   | 1.18                   | 0.90-1.54  | 0.230   |
| mALBI, grade 1 vs. grade 2b/3                   | 2.99                 | 2.35-3.81  | <0.001  | 1.68                   | 1.18-2.41  | 0.004   |
| AFP, continuous                                 | 1.00                 | 1.00-1.00  | <0.001  | 1.00                   | 1.00-1.00  | 0.017   |
| PIVKA-II, continuous                            | 1.00                 | 1.00-1.00  | <0.001  | 1.00                   | 1.00-1.00  | 0.001   |
| Child Pugh class, A vs. B                       | 1.92                 | 1.47-2.49  | <0.001  | 0.76                   | 0.52-1.09  | 0.138   |
| Child Pugh class, A vs. C                       | 16.84                | 9.09-31.22 | <0.001  | 5.14                   | 2.36-11.19 | 0.003   |
| Presentation, solitary vs. multiple             | 2.40                 | 1.93-2.99  | <0.001  | 1.25                   | 0.87-1.79  | 0.221   |
| Presentation, solitary vs. diffuse              | 2.87                 | 1.99-4.15  | <0.001  | 1.07                   | 0.69-1.67  | 0.758   |
| Size, 5-10 vs. >10 (cm)                         | 1.48                 | 1.19-1.83  | <0.001  | 1.00                   | 0.97-1.04  | 0.821   |
| Vascular invasion, negative vs. positive        | 1.25                 | 0.94-1.64  | 0.119   |                        |            |         |
| Biliary tract invasion, negative vs. positive   | 1.04                 | 0.67-1.61  | 0.870   |                        |            |         |
| PVTT classification, Vp0 vs. Vp1/2              | 1.42                 | 1.05-1.92  | 0.022   | 0.97                   | 0.66-1.44  | 0.894   |
| PVTT classification, Vp0 vs. Vp3/4              | 2.65                 | 2.12-3.33  | <0.001  | 1.49                   | 1.06-2.08  | 0.020   |
| LN metastasis, negative vs. positive            | 1.91                 | 1.49-2.46  | <0.001  | 1.41                   | 1.05-1.90  | 0.021   |
| mUICC stage, stage II vs. III                   | 2.17                 | 1.58-2.98  | <0.001  | 1.05                   | 0.65-1.71  | 0.832   |
| mUICC stage, stage II vs. IVA                   | 4.06                 | 2.95-5.60  | <0.001  | 1.35                   | 0.68-2.67  | 0.389   |
| mUICC stage, stage II vs. IVB                   | 3.79                 | 2.73-5.28  | <0.001  | 1.18                   | 0.63-2.24  | 0.603   |
| BCLC stage, A-B vs. C-D                         | 2.80                 | 2.19-3.57  | <0.001  | 1.02                   | 0.64-1.64  | 0.912   |
| Treatment, sorafenib vs. BSC                    | 2.41                 | 1.66-3.49  | <0.001  | 1.71                   | 1.07-2.74  | 0.026   |
| Treatment, sorafenib vs. surgery                | 0.23                 | 0.16-0.33  | <0.001  | 0.39                   | 0.25-0.63  | 0.007   |
| Treatment, sorafenib vs. other local treatments | 0.99                 | 0.76-1.30  | 0.94    | 1.27                   | 0.94-1.72  | 0.120   |

The foreparts of the comma were set as the reference groups in the multivariable analysis.

HR, hazard ratio; CI, confidence interval; ECOG PS, Eastern Cooperative Oncology Group performance status; mALBI, modified albumin-bilirubin score; AFP, alpha-fetoprotein; PIVKA-II, protein induced by vitamin K absence-II; PVTT, portal vein tumor thrombosis; LN, lymph node; mUICC, modified International Union Against Cancer; BCLC, Barcelona Clinic Liver Cancer; BSC, best supportive care.
