# Supplementary material for: Nomogram for predicting overall survival in patients with large (>5 cm) hepatocellular carcinoma based on real-world practice
Source: PubMed Central journal article supplement — J Liver Cancer. 2023 Sep 6;23(2):350–61. doi: 10.17998/jlc.2023.08.10 (PMC10565549; doi:10.17998/jlc.2023.08.10), 2023-09-06
Supplement: jlc-2023-08-10-Supplementary-Table-4.pdf [file jlc-2023-08-10-Supplementary-Table-4.pdf]

**Supplementary Table 4.** Patient and tumor characteristics according to initial treatment

| Variable            | Sorafenib<br>(n=69)        | BSC<br>(n=50)               | Surgery<br>(n=88)        | Non-surgical local<br>treatment (n=231) | P-value |
|---------------------|----------------------------|-----------------------------|--------------------------|-----------------------------------------|---------|
| Age                 | 57 (51-64)                 | 58 (51-68)                  | 59 (52-69)               | 57 (50-67)                              | 0.507   |
| ECOG PS             |                            |                             |                          |                                         | <0.001  |
| 0-1                 | 67 (97.1)                  | 40 (80.0)                   | 88 (100.0)               | 227 (98.3)                              |         |
| 2-4                 | 2 (2.9)                    | 10 (20.0)                   | 0 (0.0)                  | 4 (1.7)                                 |         |
| Gender              |                            |                             |                          |                                         | 0.318   |
| Female              | 5 (7.2)                    | 7 (14.0)                    | 15 (17.0)                | 28 (12.1)                               |         |
| Male                | 64 (92.8)                  | 43 (86.0)                   | 73 (83.0)                | 203 (87.9)                              |         |
| Child-Pugh class    |                            |                             |                          |                                         | <0.001  |
| A                   | 59 (85.5)                  | 14 (28.0)                   | 87 (98.9)                | 197 (85.3)                              |         |
| B/C                 | 10 (14.5)                  | 36 (72.0)                   | 1 (1.1)                  | 34 (14.7)                               |         |
| mALBI grade         |                            |                             |                          |                                         | <0.001  |
| 1                   | 33 (47.8)                  | 5 (10.0)                    | 76 (86.4)                | 130 (56.3)                              |         |
| 2a                  | 21 (30.4)                  | 7 (14.0)                    | 11 (12.5)                | 52 (22.5)                               |         |
| 2b/3                | 15 (21.7)                  | 38 (76.0)                   | 1 (1.1)                  | 49 (21.2)                               |         |
| AFP (ng/mL)         | 2,189.4 (58.3-30,056.0)    | 4,915.5 (206.0-60,500.0)    | 150.7 (5.6-12,141.4)     | 843.2 (29.0-19,852.3)                   | <0.001  |
| PIVKA-II (mAU/mL)   | 8,251.0 (1,477.0-28,589.0) | 39,887.0 (7,343.0-75,000.0) | 5,875.0 (488.0-27,660.5) | 7,159.0 (1,302.0-32,409.0)              | <0.001  |
| Tumor size (cm)     | 15.0 (13.3-15.0)           | 15.0 (13.0-15.0)            | 12.0 (9.0-15.0)          | 15.0 (9.4-15.0)                         | <0.001  |
| Vascular invasion   | 16 (23.2)                  | 7 (14.0)                    | 4 (4.5)                  | 33 (14.3)                               | 0.009   |
| Bile duct invasion  | 3 (4.3)                    | 6 (12.0)                    | 3 (3.4)                  | 10 (4.3)                                | 0.165   |
| PVTT classification |                            |                             |                          |                                         | <0.001  |
| Vp0                 | 15 (21.7)                  | 14 (28.0)                   | 71 (80.7)                | 82 (35.5)                               |         |
| Vp1/2               | 7 (10.1)                   | 3 (6.0)                     | 9 (10.2)                 | 46 (19.9)                               |         |
| Vp3/4               | 47 (68.2)                  | 33 (66.0)                   | 8 (9.1)                  | 103 (44.6)                              |         |
| LN metastasis       | 25 (36.2)                  | 10 (20.0)                   | 3 (3.4)                  | 40 (17.3)                               | <0.001  |
| mUICC               |                            |                             |                          |                                         | <0.001  |
| II                  | 0 (0.0)                    | 3 (6.0)                     | 51 (58.0)                | 30 (13.0)                               |         |
| III                 | 11 (15.9)                  | 12 (24.0)                   | 24 (27.3)                | 72 (31.2)                               |         |
| IVA                 | 23 (33.3)                  | 17 (34.0)                   | 6 (6.8)                  | 88 (38.1)                               |         |
| IVB                 | 35 (50.7)                  | 18 (36.0)                   | 7 (8.0)                  | 41 (17.7)                               |         |
| BCLC                |                            |                             |                          |                                         | <0.001  |
| A-B                 | 2 (2.9)                    | 3 (6.0)                     | 63 (71.6)                | 49 (21.2)                               |         |
| C-D                 | 67 (97.1)                  | 47 (94.0)                   | 25 (28.4)                | 182 (78.8)                              |         |

Values are presented as patient number (%) or median (interquartile range).

BSC, best supportive care; ECOG PS, Eastern Cooperative Oncology Group performance status; mALBI, modified albumin-bilirubin score; AFP, alpha-fetoprotein; PIVKA-II, protein induced by vitamin K absence-II; PVTT, portal vein tumor thrombosis; LN, lymph node; mUICC, modified International Union Against Cancer; BCLC, Barcelona Clinic Liver Cancer.
