# Supplementary figures and images for: Nomogram for predicting overall survival in patients with large (>5 cm) hepatocellular carcinoma based on real-world practice
Source: PubMed Central journal article supplement — J Liver Cancer. 2023 Sep 6;23(2):350–61. doi: 10.17998/jlc.2023.08.10 (PMC10565549; doi:10.17998/jlc.2023.08.10), 2023-09-06

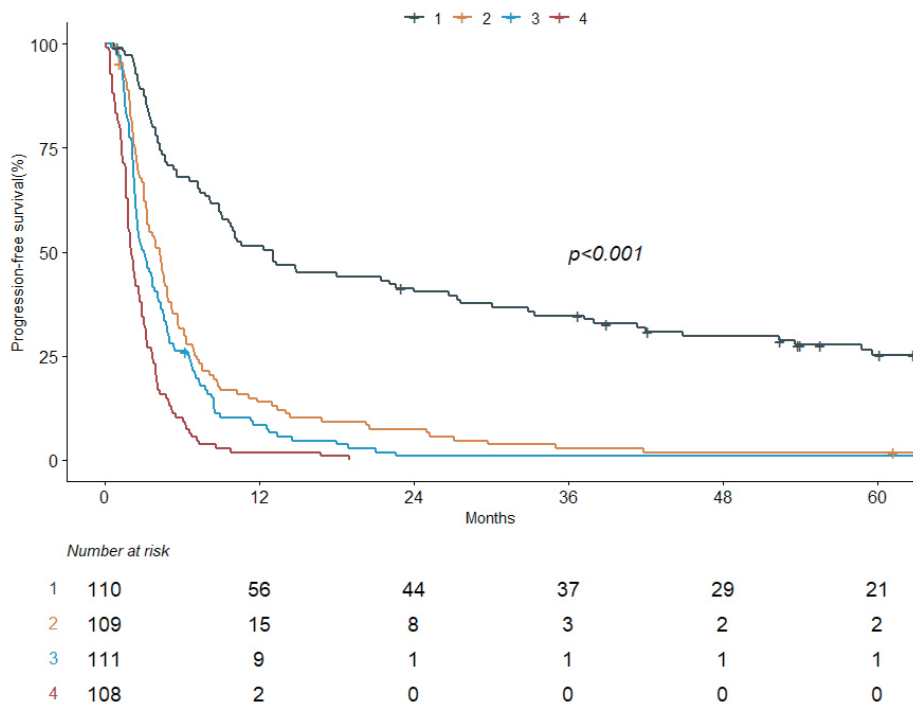

**Supplementary Figure 1.** Progression-free survival according to the new nomogram.

Supplement: jlc-2023-08-10-Supplementary-Fig-1.pdf [file jlc-2023-08-10-Supplementary-Fig-1.pdf]
